# Supplementary material
Source: PubMed Central journal article supplement (PMC4698036)
Supplement: NIHMS741607-supplement.pdf [file NIHMS741607-supplement.pdf]

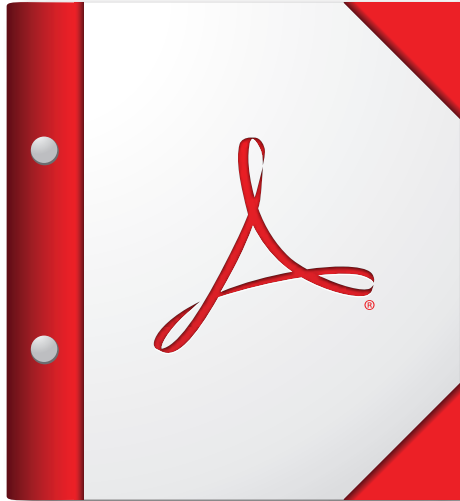

**For the best experience, open this PDF portfolio in  
Acrobat X or Adobe Reader X, or later.**

[Get Adobe Reader Now!](#)
